# Supplementary material for: Source differences in the components and cytotoxicity of PM 2.5 from automobile exhaust, coal combustion, and biomass burning contributing to urban aerosol toxicity
Source: Copernicus journal article supplement (doi:10.5194/acp-24-1345-2024), 2024-01-30
Supplement: Supplementary file 1 [file acp-24-1345-2024-supplement.pdf]

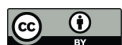

*Supplement of*

**Source differences in the components and cytotoxicity of PM<sub>2.5</sub> from automobile exhaust, coal combustion, and biomass burning contributing to urban aerosol toxicity**

**Xiao-San Luo et al.**

*Correspondence to:* Xiao-San Luo (xsluo@nuist.edu.cn)

The copyright of individual parts of the supplement might differ from the article licence.

17 **Captions of figures and tables**

18

19 **Figure S1.** Schematic of a dilution 4-channel sampler used for collecting PM<sub>2.5</sub> directly from various combustion source  
20 emissions.

21 **Figure S2.** Samples of PM<sub>2.5</sub> loaded in quartz filters collected from 30 typical anthropogenic combustion sources (a:  
22 automobile exhaust; b: coal combustion; c: domestic plant biomass burning).

23 **Figure S3.** Example of daily urban air PM<sub>2.5</sub> concentrations ( $\mu\text{g m}^{-3}$ ) monitored in Nanjing city, eastern China.

24 **Figure S4.** The PMF factor profiles of various components and source percentages of secondary aerosol, automobile exhaust,  
25 coal combustion, and plant biomass burning contributing to the urban ambient air PM<sub>2.5</sub>.

26 **Figure S5.** Contents ( $\text{mg kg}^{-1}$ ) and ratio of carbon fractions in PM<sub>2.5</sub> from 10 types of automobile exhaust.

27 **Figure S6.** Contents ( $\text{mg kg}^{-1}$ ) and ratio of carbon fractions in PM<sub>2.5</sub> from 10 types of coal combustion.

28 **Figure S7.** Contents ( $\text{mg kg}^{-1}$ ) and ratio of carbon fractions in PM<sub>2.5</sub> from 10 types of domestic plant biomass burning.

29 **Figure S8.** Contents ( $\text{mg kg}^{-1}$ ) and ratio of carbon fractions in ambient air PM<sub>2.5</sub> from Nanjing city, eastern China.

30 **Figure S9.** Heavy metal contents ( $\text{mg kg}^{-1}$ ) in PM<sub>2.5</sub> from 10 types of automobile exhaust.

31 **Figure S10.** Heavy metal contents ( $\text{mg kg}^{-1}$ ) in PM<sub>2.5</sub> from 10 types of coal combustion.

32 **Figure S11.** Heavy metal contents ( $\text{mg kg}^{-1}$ ) in PM<sub>2.5</sub> from 10 types of domestic plant biomass burning.

33 **Figure S12.** Heavy metal contents ( $\text{mg kg}^{-1}$ ) in ambient air PM<sub>2.5</sub> from Nanjing city, eastern China.

34 **Figure S13.** Water-soluble ions (WSIs) contents ( $\text{mg kg}^{-1}$ ) in PM<sub>2.5</sub> from 10 types of automobile exhaust.

35 **Figure S14.** Water-soluble ions (WSIs) contents ( $\text{mg kg}^{-1}$ ) in PM<sub>2.5</sub> from 10 types of coal combustion.

36 **Figure S15.** Water-soluble ions (WSIs) contents ( $\text{mg kg}^{-1}$ ) in PM<sub>2.5</sub> from 10 types of domestic plant biomass burning.

37 **Figure S16.** Water-soluble ions (WSIs) contents ( $\text{mg kg}^{-1}$ ) in monthly ambient air PM<sub>2.5</sub> from Nanjing city, eastern China.

38 **Figure S17.** Cell viability, oxidative stress and inflammation levels exposed to PM<sub>2.5</sub> from 10 types of automobile exhaust.

39 **Figure S18.** Cell viability, oxidative stress and inflammation levels exposed to PM<sub>2.5</sub> from 10 types of coal combustion.

40 **Figure S19.** Cell viability, oxidative stress and inflammation levels exposed to PM<sub>2.5</sub> from 10 types of domestic plant biomass  
41 burning.

42 **Figure S20.** Cell viability, oxidative stress and inflammation levels exposed to various ambient air PM<sub>2.5</sub> from Nanjing city,  
43 eastern China.

44

45 **Table S1.** Characteristics and collection process of the investigated typical vehicles.

46 **Table S2.** Characteristic analysis and collection process of typical coal samples.

47 **Table S3.** Characteristic analysis and collection process of typical domestic plant biomass fuel samples.

48 **Table S4.** The CMB source profiles of coal combustion, plant biomass burning, automobile exhaust, and secondary sources  
49 ( $\text{g/g}$ ).

50

51

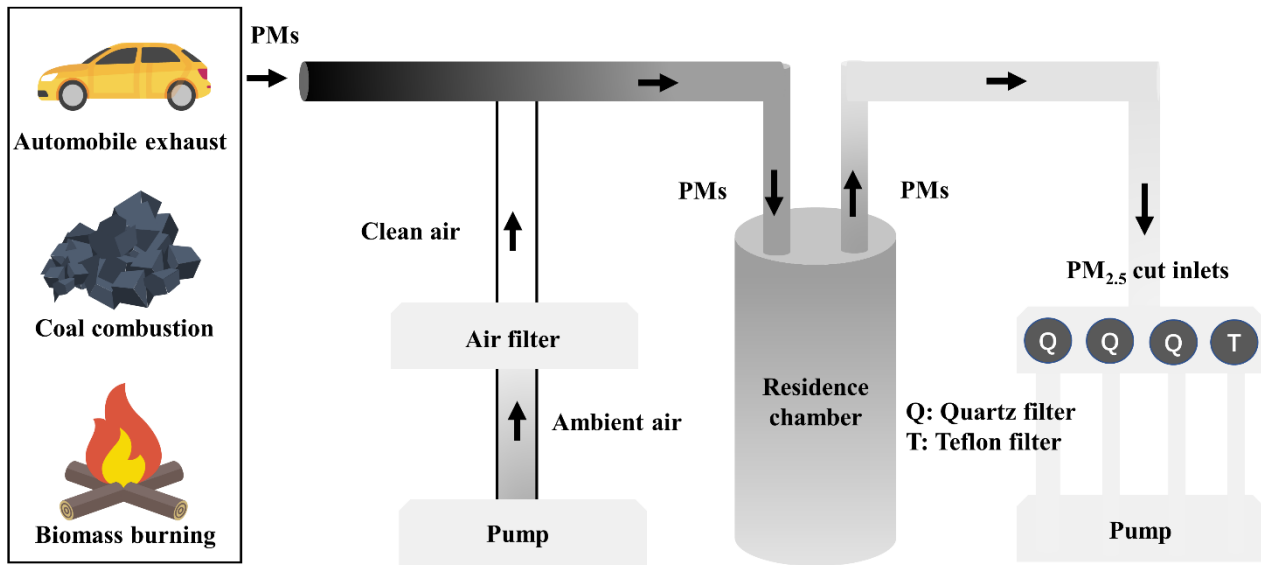

52

53 **Figure S1. Schematic of a dilution 4-channel sampler used for collecting PM<sub>2.5</sub> directly from various combustion source emissions.**

54

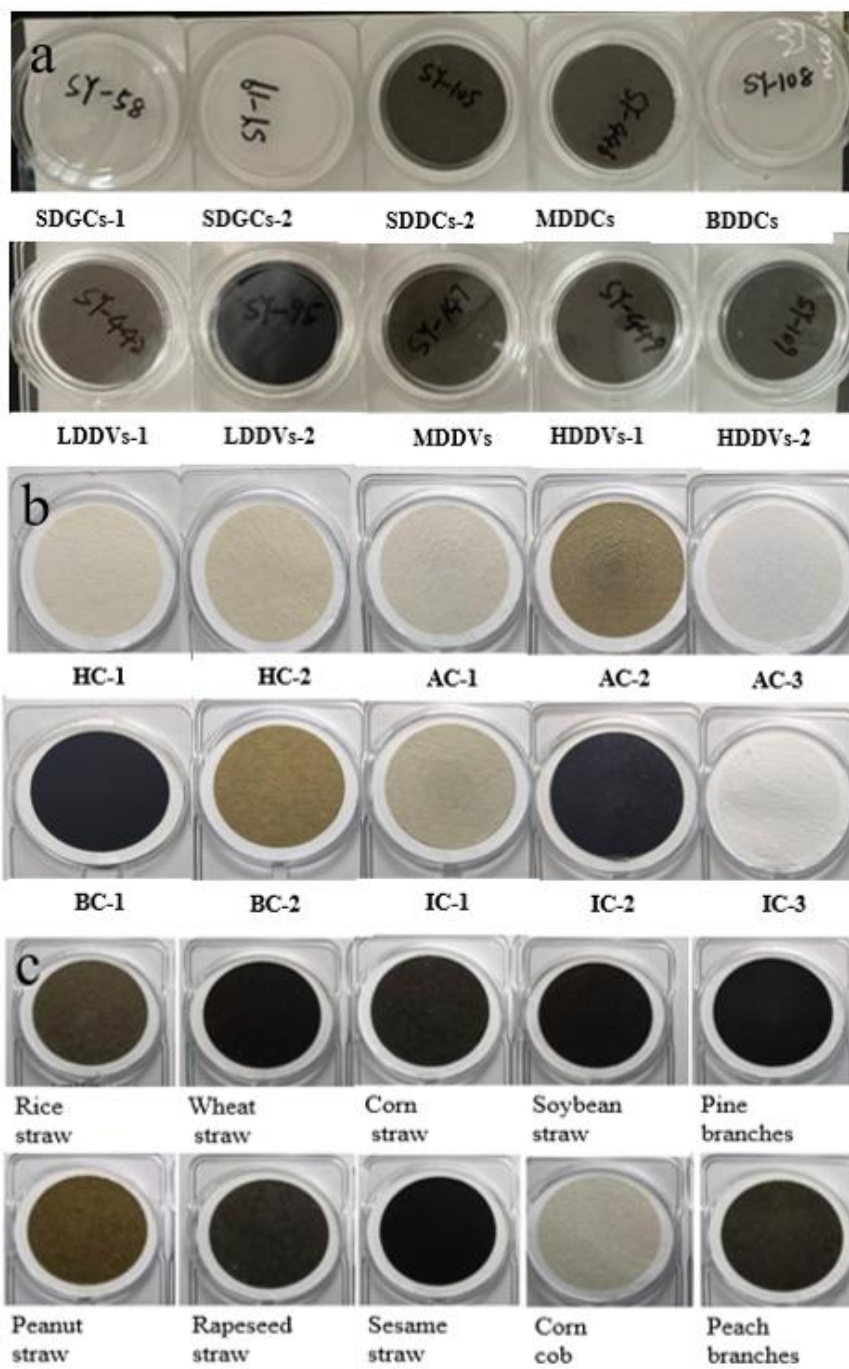

55

56 Figure S2. Samples of PM<sub>2.5</sub> loaded in quartz filters collected from 30 typical anthropogenic combustion sources (a: automobile  
 57 exhaust; b: coal combustion; c: domestic plant biomass burning).

58

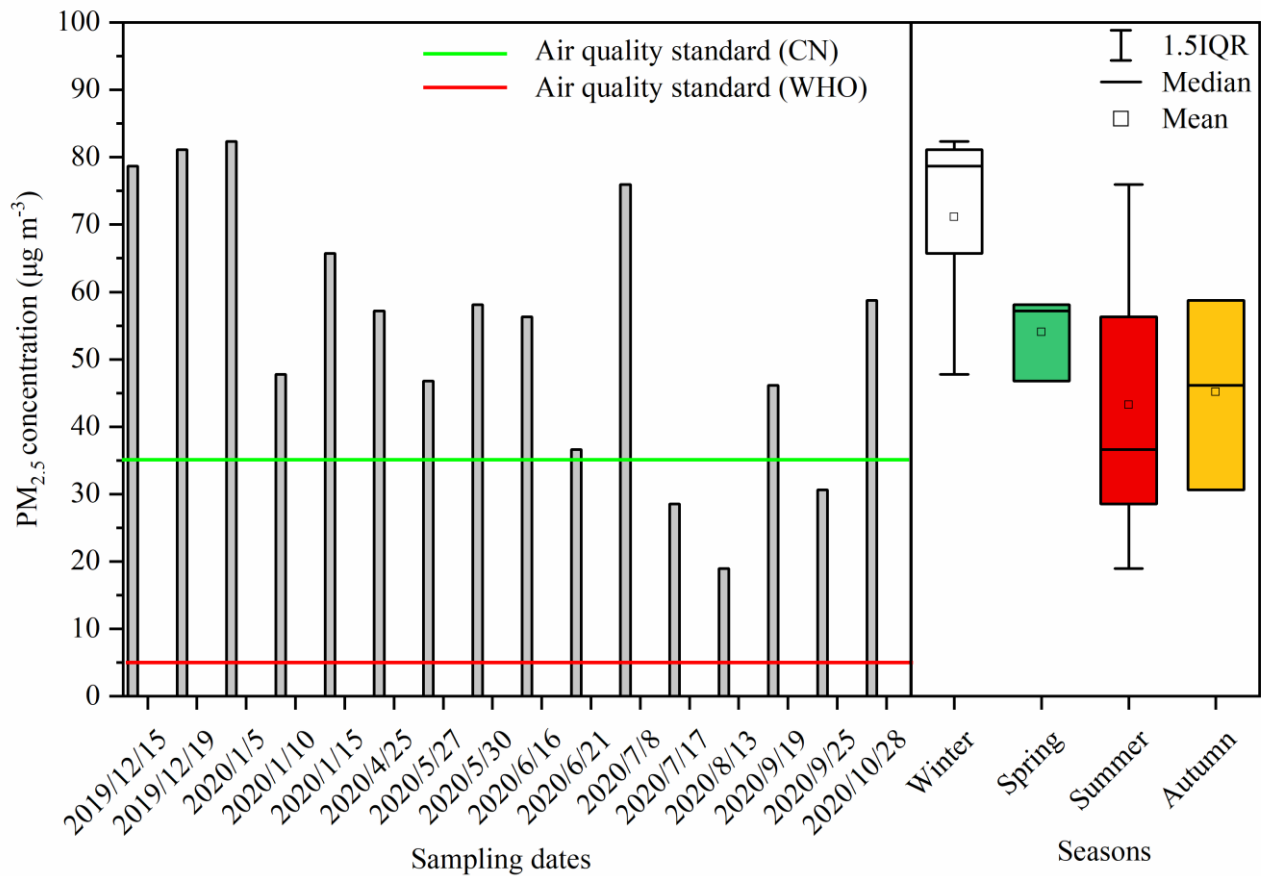

60

61 **Figure S3. Example of daily urban air PM<sub>2.5</sub> concentrations (µg m<sup>-3</sup>) monitored in Nanjing city, eastern China.**

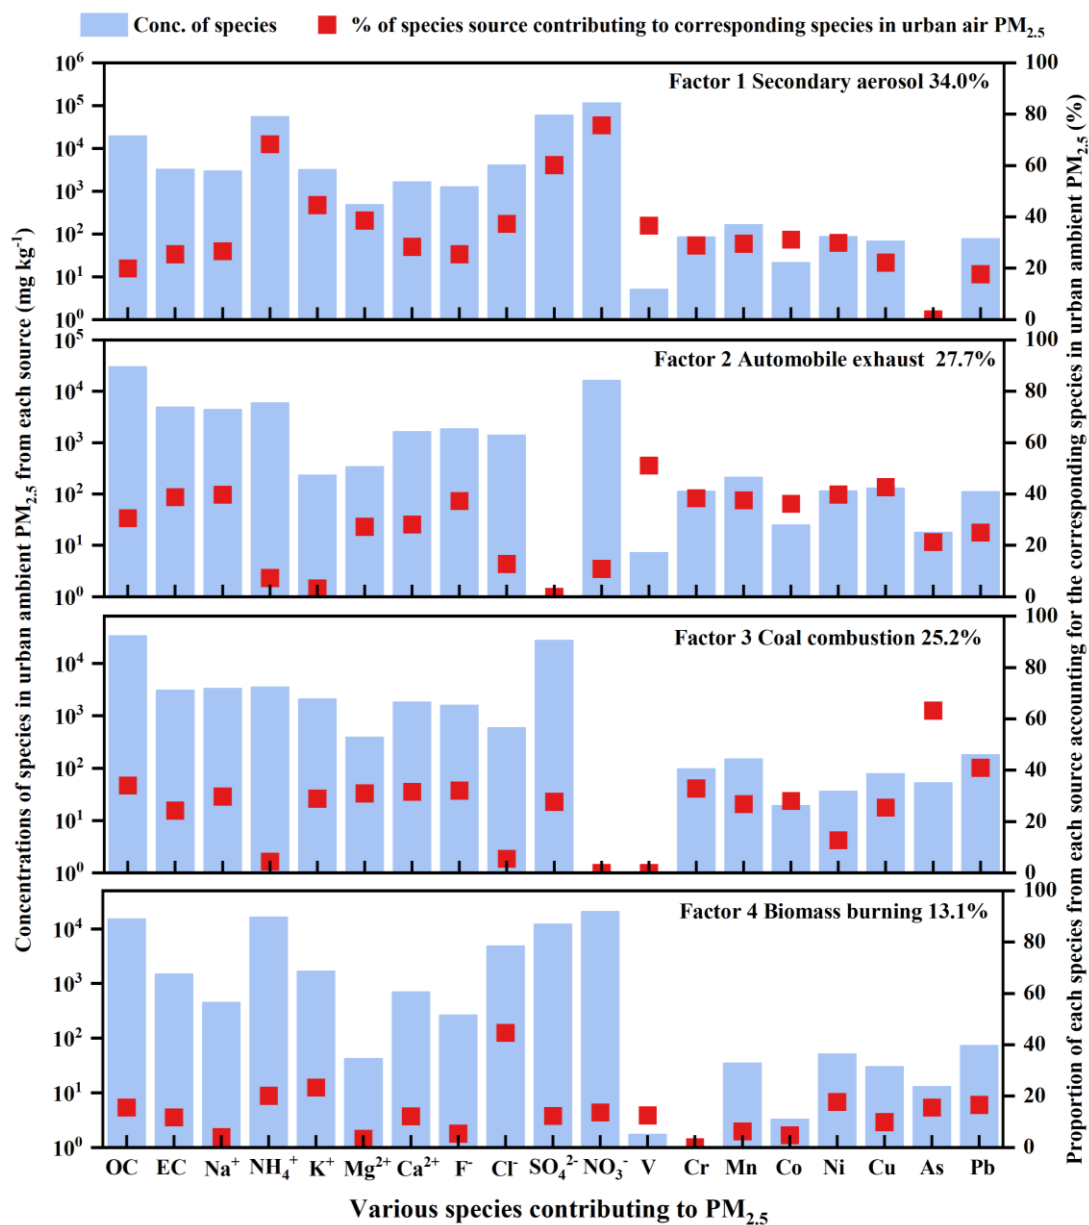

62

63 Figure S4. The PMF factor profiles of various components and source percentages of secondary aerosol, automobile exhaust, coal  
 64 combustion, and plant biomass burning contributing to the urban ambient air PM<sub>2.5</sub>.

65

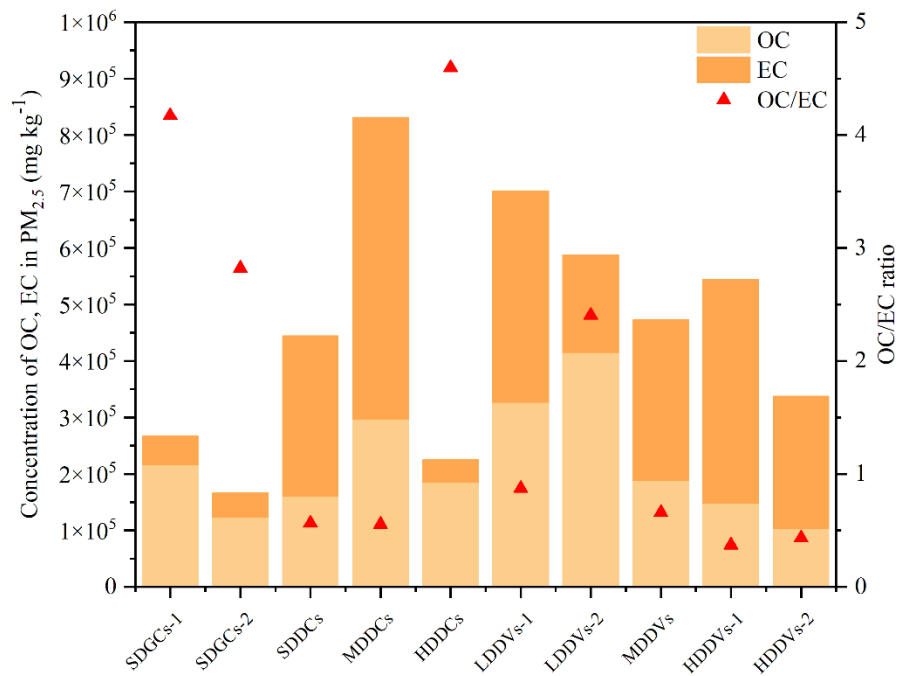

66

67 **Figure S5. Contents (mg kg<sup>-1</sup>) and ratio of carbon fractions in PM<sub>2.5</sub> from 10 types of automobile exhaust.**

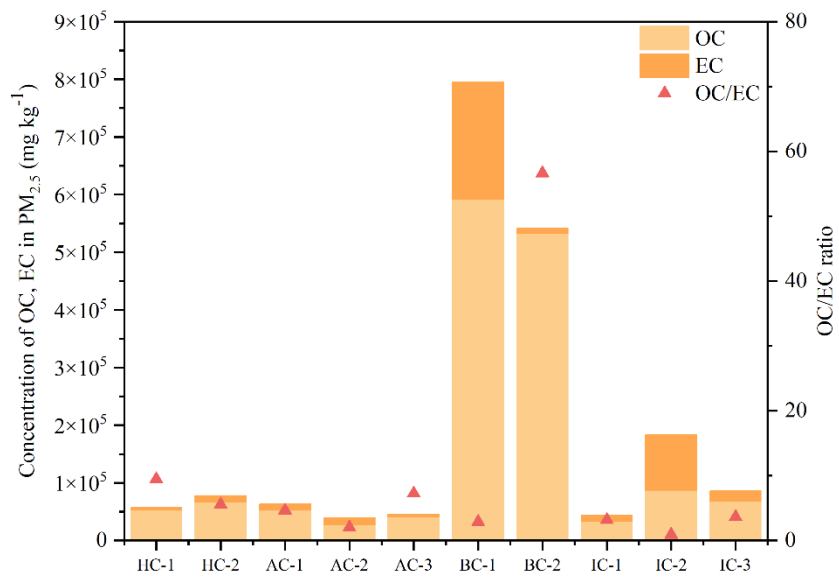

68

69 **Figure S6. Contents ( $\text{mg kg}^{-1}$ ) and ratio of carbon fractions in  $\text{PM}_{2.5}$  from 10 types of coal combustion.**



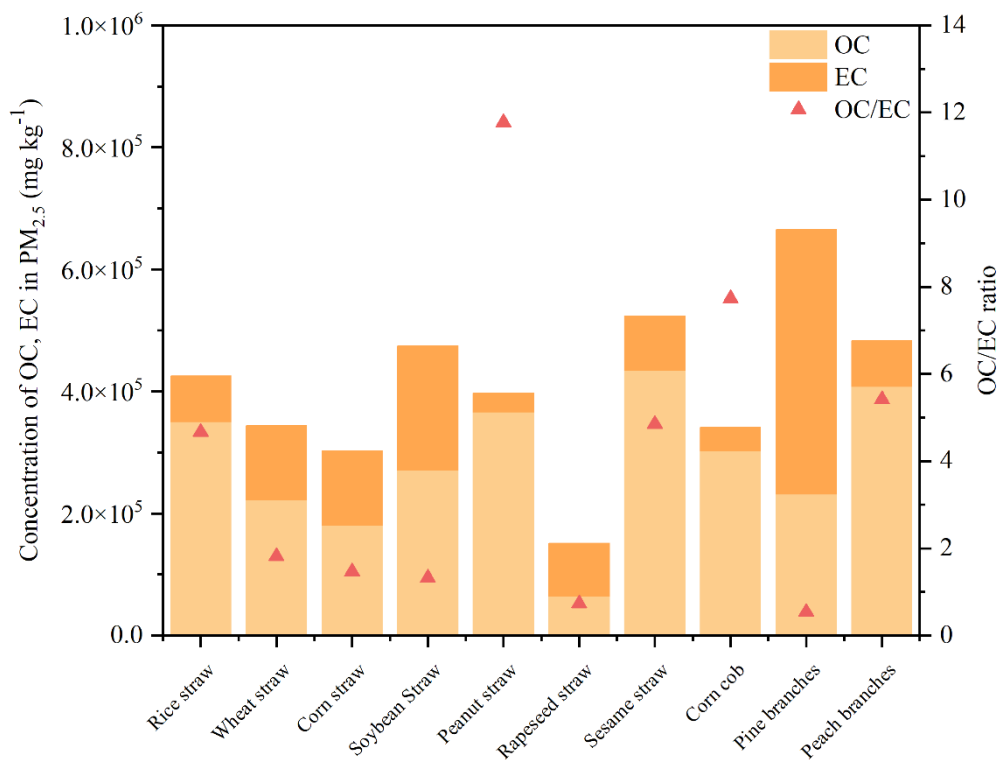

70

71 **Figure S7. Contents ( $\text{mg kg}^{-1}$ ) and ratio of carbon fractions in  $\text{PM}_{2.5}$  from 10 types of domestic plant biomass burning.**

72

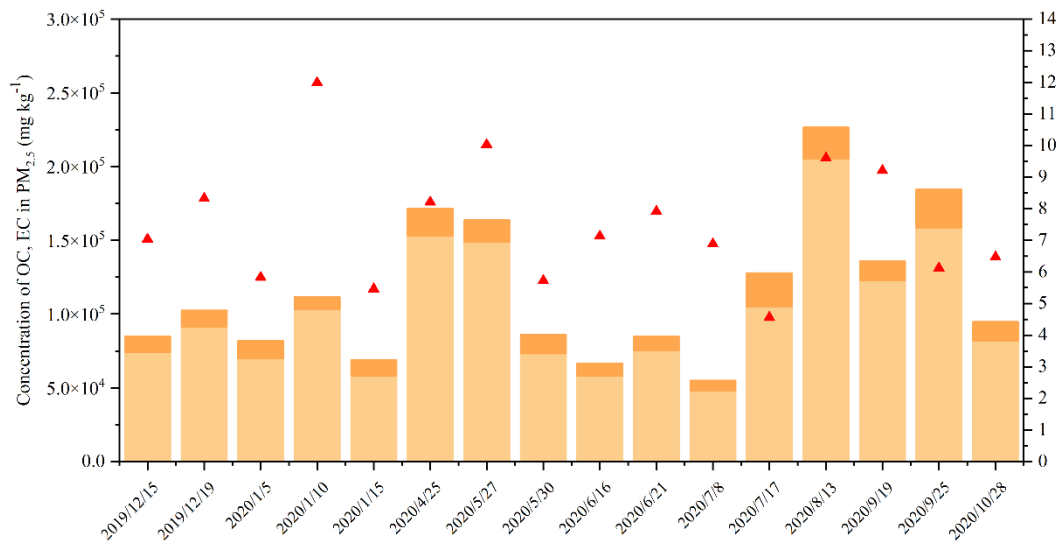

74

75 **Figure S8. Contents (mg kg<sup>-1</sup>) and ratio of carbon fractions in ambient air PM<sub>2.5</sub> from Nanjing city, eastern China.**

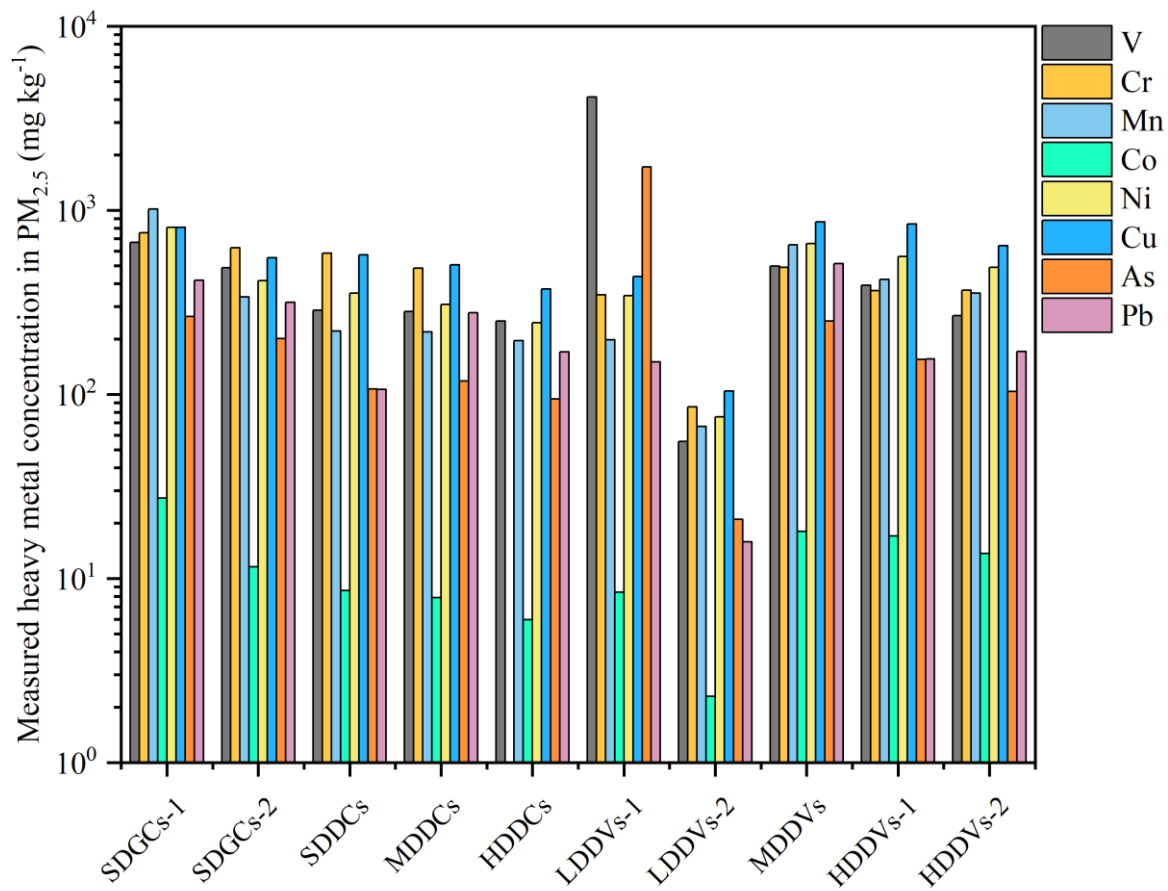

76

77 **Figure S9. Heavy metal contents (mg kg<sup>-1</sup>) in PM<sub>2.5</sub> from 10 types of automobile exhaust.**

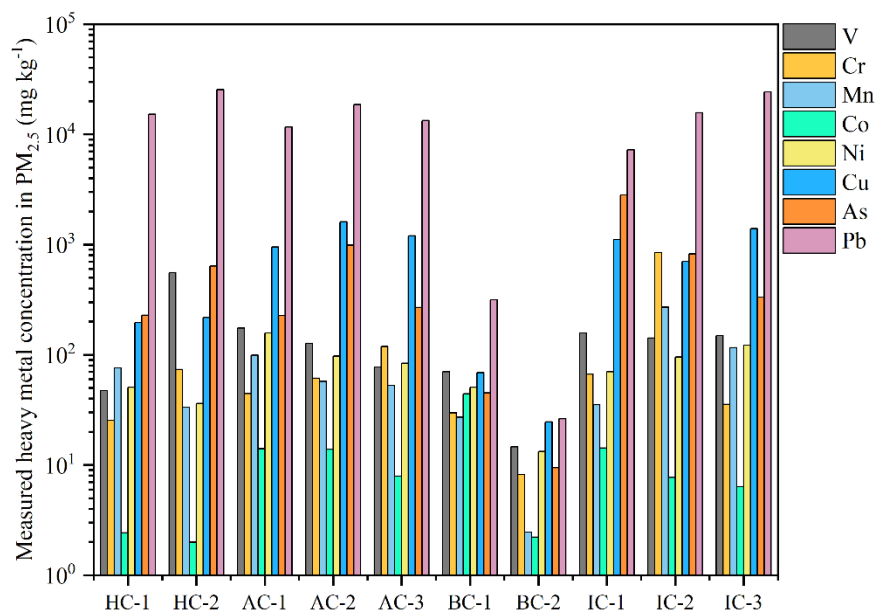

78

79 **Figure S10. Heavy metal contents ( $mg\ kg^{-1}$ ) in  $PM_{2.5}$  from 10 types of coal combustion.**

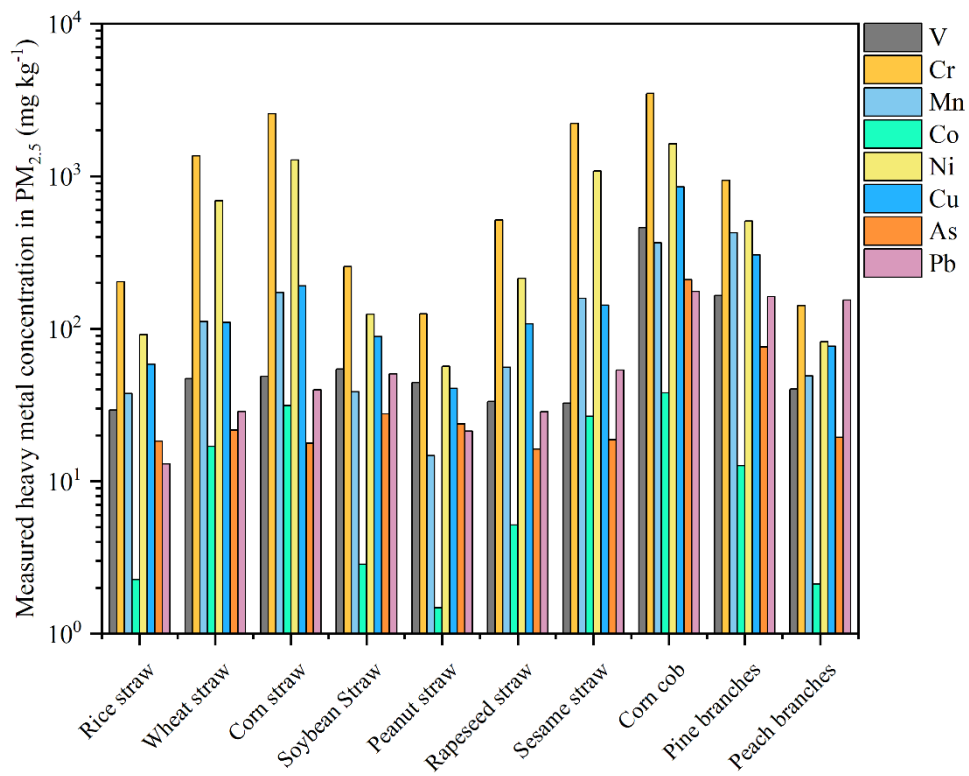

80

81 **Figure S11. Heavy metal contents ( $\text{mg kg}^{-1}$ ) in  $\text{PM}_{2.5}$  from 10 types of domestic plant biomass burning.**

82

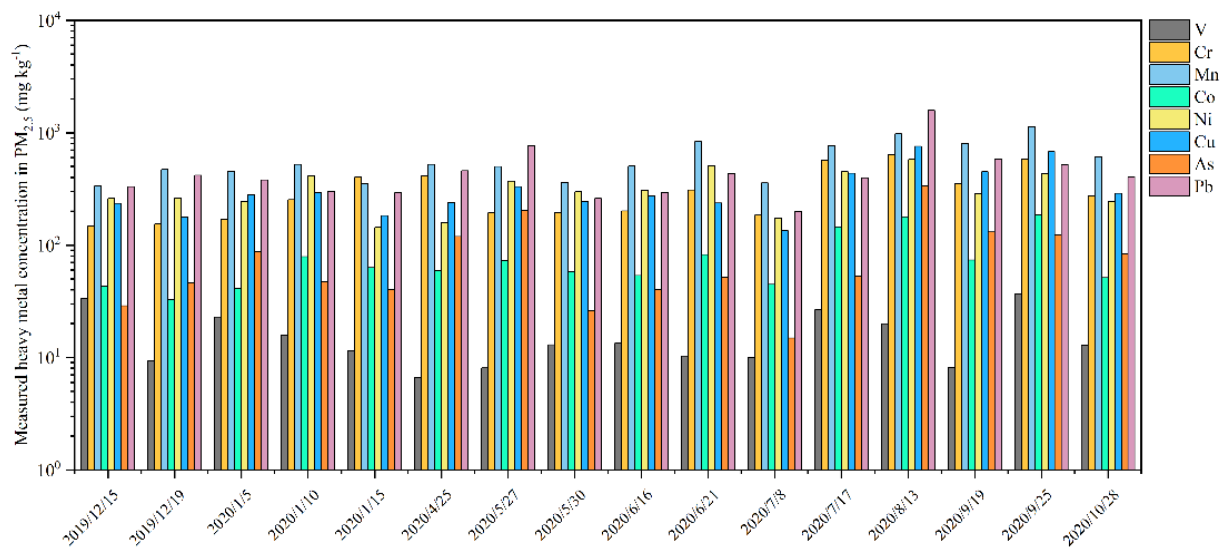

84

85 **Figure S12. Heavy metal contents ( $\text{mg kg}^{-1}$ ) in ambient air  $\text{PM}_{2.5}$  from Nanjing city, eastern China.**

86

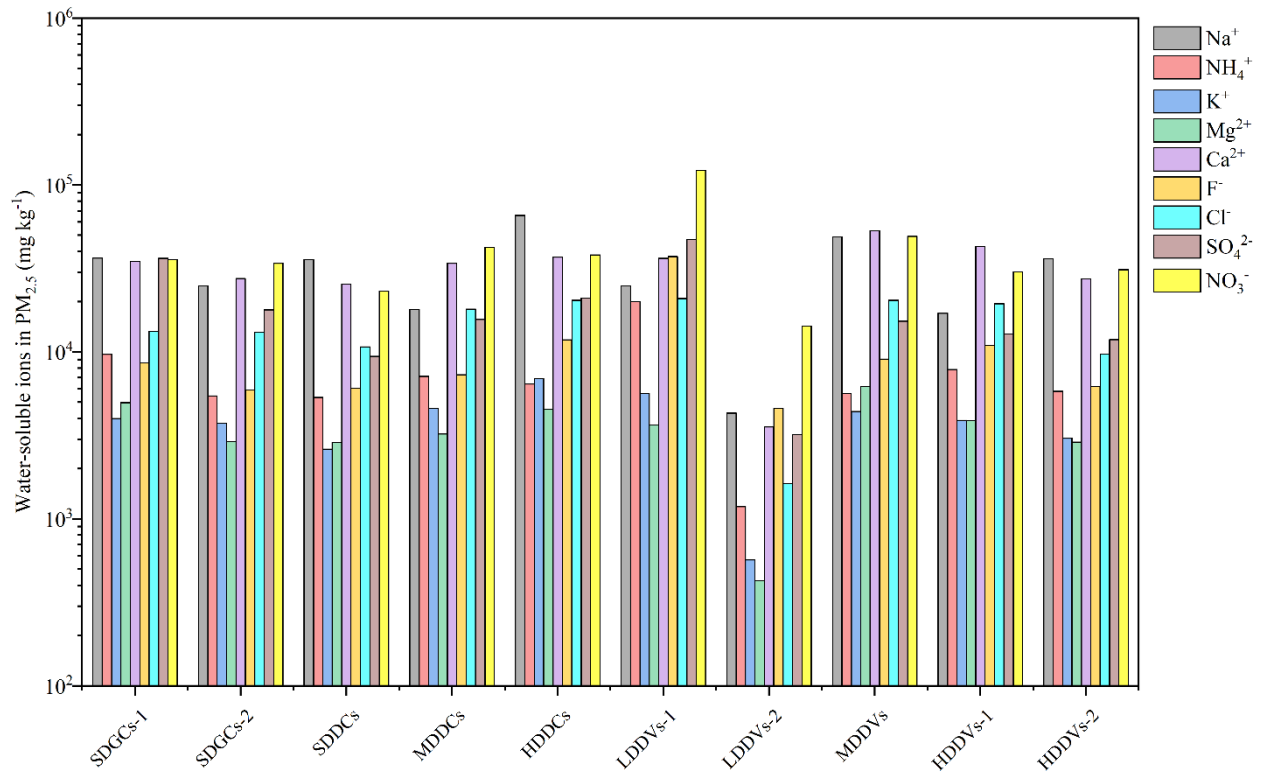

88

89 **Figure S13. Water-soluble ions (WSIs) contents ( $mg\ kg^{-1}$ ) in  $PM_{2.5}$  from 10 types of automobile exhaust.**

90

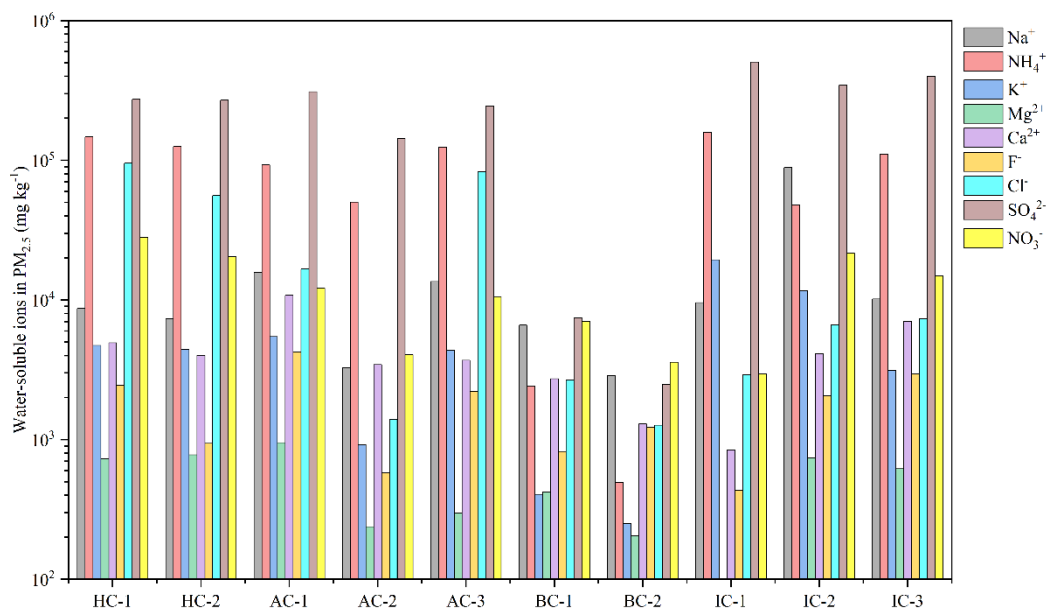

92

93 **Figure S14. Water-soluble ions (WSIs) contents (mg kg<sup>-1</sup>) in PM<sub>2.5</sub> from 10 types of coal combustion.**

94



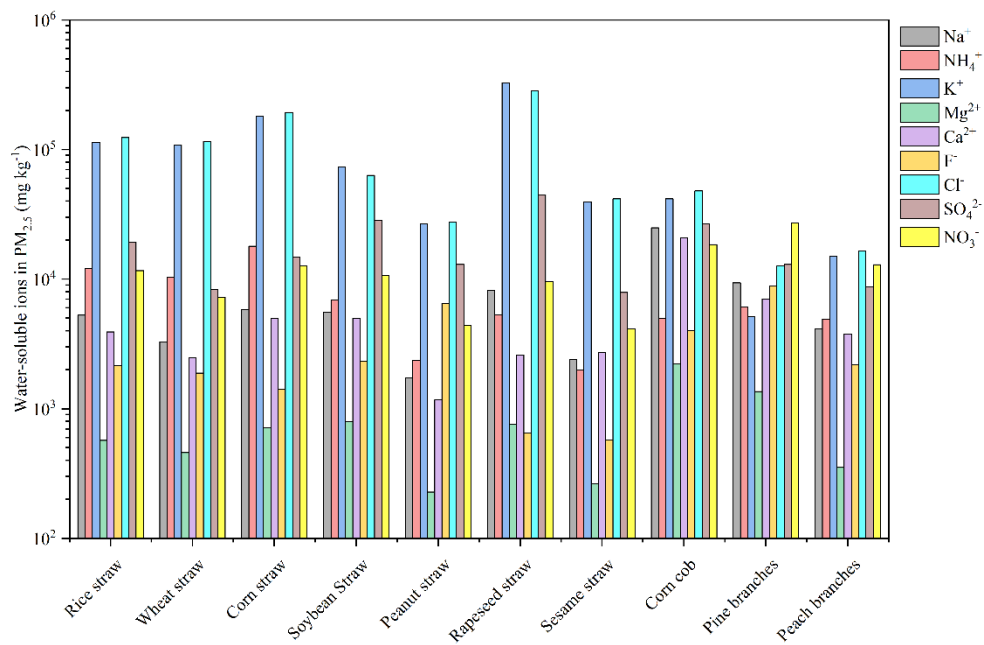

96

97 **Figure S15. Water-soluble ions (WSIs) contents ( $mg\ kg^{-1}$ ) in  $PM_{2.5}$  from 10 types of domestic plant biomass burning.**

98

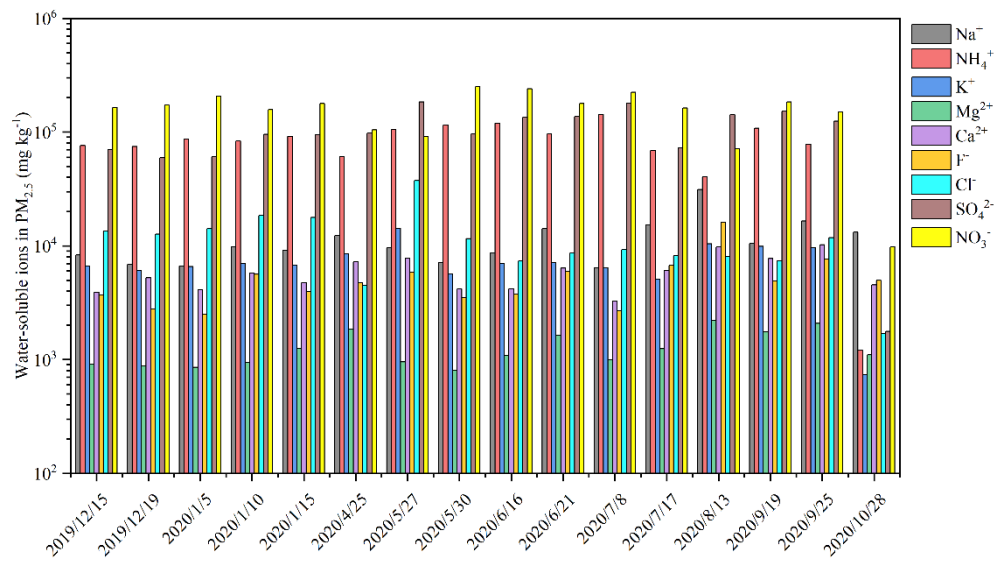

100

101 **Figure S16. Water-soluble ions (WSIs) contents ( $\text{mg kg}^{-1}$ ) in ambient air  $\text{PM}_{2.5}$  from Nanjing city, eastern China.**

102

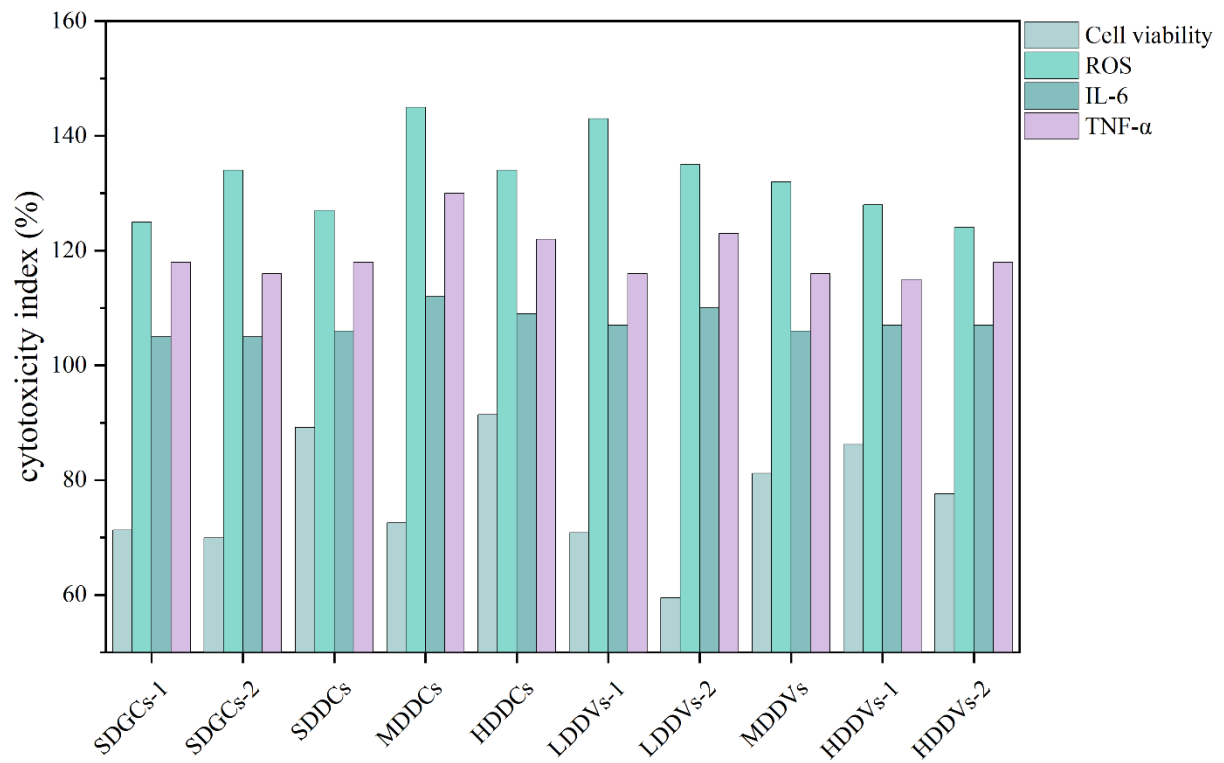

104

105 **Figure S17. Cell viability, oxidative stress and inflammation levels exposed to PM<sub>2.5</sub> from 10 types of automobile exhaust.**

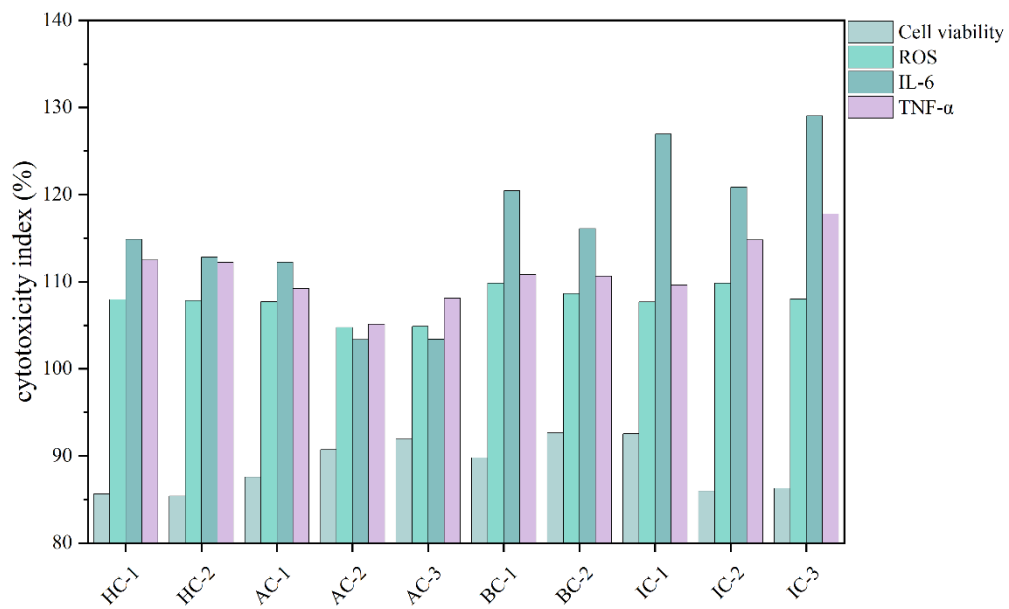

106

107 **Figure S18. Cell viability, oxidative stress and inflammation levels exposed to PM<sub>2.5</sub> from 10 types of coal combustion.**

108

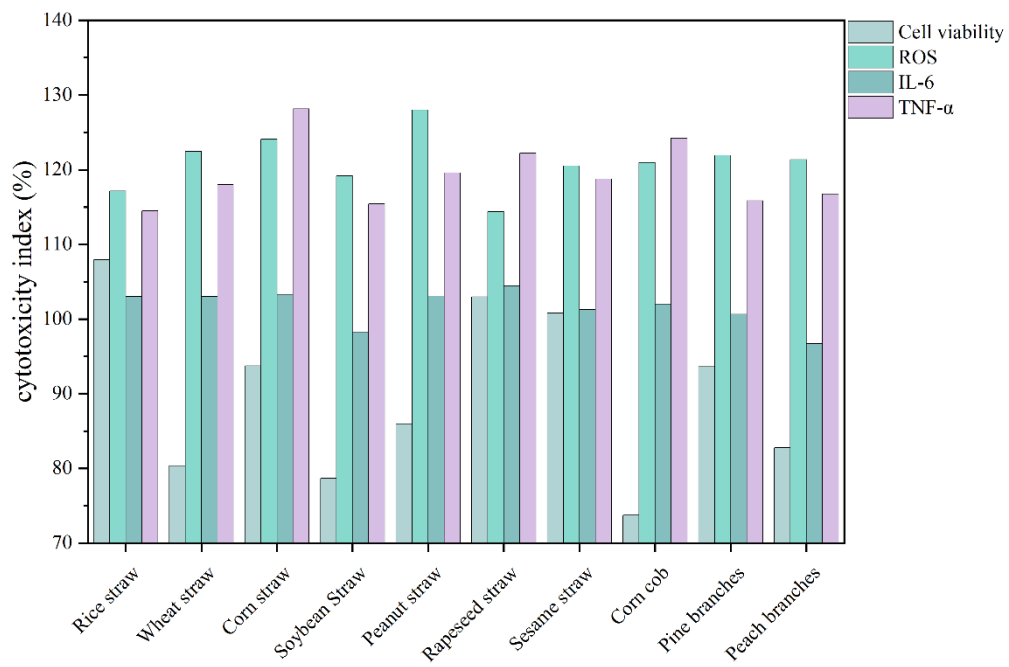

109

110 **Figure S19. Cell viability, oxidative stress and inflammation levels exposed to PM<sub>2.5</sub> from 10 types of domestic plant biomass burning.**

111

112

113

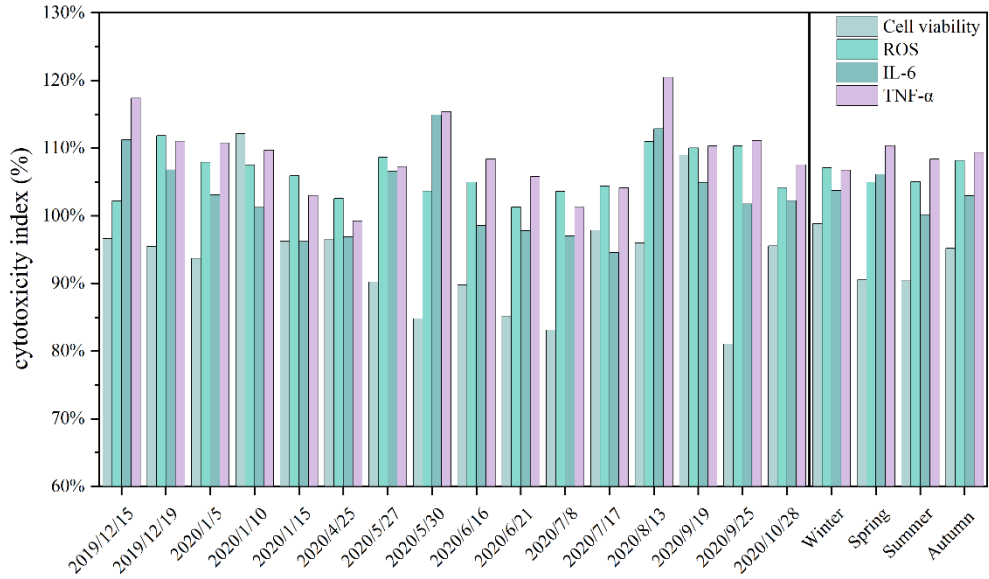

114

115 **Figure S20. Cell viability, oxidative stress and inflammation levels exposed to various ambient air PM<sub>2.5</sub> from Nanjing city, eastern**  
116 **China.**

117

118

120 **Table S1.** Characteristics and collection process of the investigated typical vehicles.

| No. | Abbreviations | Vehicle types             | Manufacture year | Emission standards | Fuel type | Collection time (min) | Weight (kg) |
|-----|---------------|---------------------------|------------------|--------------------|-----------|-----------------------|-------------|
| #1  | SDGCs-1       | Small duty gasoline coach | 2015             | CN.V               | CN.92#    | 120                   | 1970        |
| #2  | SDGCs-2       | Small duty gasoline coach | 2019             | CN.VI              | CN.92#    | 120                   | 2110        |
| #3  | SDDCs         | Small duty diesel coach   | lost             | CN.IV              | CN.5#     | 20                    | 1790        |
| #4  | MDDCs         | Middle duty diesel coach  | 2009             | CN.IV              | CN.5#     | 20                    | 3600        |
| #5  | HDDCs         | Heavy duty diesel coach   | 2015             | CN.V               | CN.5#     | 20                    | 15800       |
| #6  | LDDVs-1       | Light duty diesel van     | 2009             | CN.III             | CN.5#     | 20                    | 3970        |
| #7  | LDDVs-2       | Light duty diesel van     | 2015             | CN.IV              | CN.5#     | 20                    | 4500        |
| #8  | MDDVs         | Middle duty diesel van    | 2014             | CN.IV              | CN.5#     | 20                    | 7320        |
| #9  | HDDVs-1       | Heavy duty diesel van     | 2015             | CN.IV              | CN.5#     | 20                    | 29080       |
| #10 | HDDVs-2       | Heavy duty diesel van     | 2019             | CN.V               | CN.5#     | 20                    | 40000       |

123

124 **Table S2.** Characteristic analysis and collection process of typical coal samples.

| Coal types | M <sub>ad</sub> (%) | A <sub>ad</sub> (%) | V <sub>ad</sub> (%) | FC <sub>ad</sub> (%) | Fuel consumption (g) | Burning duration (min) | Origin                                             |
|------------|---------------------|---------------------|---------------------|----------------------|----------------------|------------------------|----------------------------------------------------|
| HC-1       | 1.87                | 46.2                | 9.87                | 42.1                 | 1169                 | 158                    | Nanjing city                                       |
| HC-2       | 2.15                | 49.3                | 9.63                | 38.9                 | 1138                 | 144                    | Nanjing city                                       |
| AC-1       | 1.26                | 10.2                | 10.6                | 78                   | 739                  | 222                    | Ningxia province                                   |
| AC-2       | 1.19                | 12.5                | 10.8                | 75.5                 | 1024                 | 180                    | Anhui province                                     |
| AC-3       | 1.76                | 6.78                | 8.99                | 82.5                 | 537                  | 170                    | Shanxi province                                    |
| BC-1       | 5.23                | 1.84                | 41.5                | 51.5                 | 8117                 | 102                    | Inner Mongolia province                            |
| BC-2       | 7.06                | 5.07                | 29.8                | 58                   | 669                  | 85                     | Henan province                                     |
| IC-1       | 0.43                | 13                  | 1.63                | 85                   | 559                  | 115                    | Nanjing Iron & Steel Co.                           |
| IC-2       | 1.74                | 11.1                | 30.3                | 56.9                 | 601                  | 90                     | China Resources Jiangsu Nanre Power Generation Co. |
| IC-3       | 4.37                | 8.17                | 30.9                | 56.5                 | 652                  | 95                     | Huaneng Nanjing Jinling Power Generation Co.       |

125 Note: M<sub>ad</sub> is the moisture mass fraction of the sample on an air-dried basis; A<sub>ad</sub> is the ash mass fraction of the sample on  
126 an air-dried basis; V<sub>dad</sub> is volatile matter mass fraction of sample on dry air-dried basis; FC<sub>ad</sub> is fixed carbon fraction of the  
127 sample on an air-dried basis;  $FC_{ad} = 1 - M_{ad} - A_{ad} - V_{dad}$ .

128

129



130

131 **Table S3.** Characteristic analysis and collection process of typical plant biomass fuel samples.

| Biomass types  | $M_{ad}$ (%) | $A_{ad}$ (%) | $V_{ad}$ (%) | $FC_{ad}$ (%) | Fuel consumption (g) | Burning duration |
|----------------|--------------|--------------|--------------|---------------|----------------------|------------------|
| Rice straw     | 10.8         | 14.6         | 59.8         | 14.9          | 83                   | 4'24"            |
| Wheat straw    | 12.1         | 5.65         | 65.5         | 16.8          | 328                  | 9'14"            |
| Corn straw     | 11.6         | 4.22         | 66.1         | 18.1          | 108                  | 4'39"            |
| Soybean straw  | 11           | 4.62         | 68.4         | 16            | 360                  | 11'24"           |
| Peanut straw   | 15           | 10.8         | 61.4         | 12.8          | 49                   | 1'20"            |
| Rape straw     | 11.1         | 2.95         | 68.8         | 17.1          | 39                   | 1'05"            |
| Sesame straw   | 13.1         | 7.64         | 63.7         | 15.5          | 154                  | 2'42"            |
| Corn cob       | 9.21         | 0.66         | 73.5         | 16.7          | 131                  | 11'35"           |
| Pine branches  | 13.4         | 0.33         | 66.6         | 19.7          | 148                  | 12'20"           |
| Peach branches | 9.94         | 0.65         | 73.4         | 16            | 244                  | 16'45"           |

132

133 Note:  $M_{ad}$  is the moisture mass fraction of the sample on an air-dried basis;  $A_{ad}$  is the ash mass fraction of the sample on  
134 an air-dried basis;  $V_{ad}$  is volatile matter mass fraction of sample on dry air-dried basis;  $FC_{ad}$  is fixed carbon fraction of the  
135 sample on an air-dried basis;  $FC_{ad} = 1 - M_{ad} - A_{ad} - V_{ad}$ .

136

137

138 **Table S4** The CMB source profiles of coal combustion, plant biomass burning, automobile exhaust, and  
 139 secondary sources (g/g).

| Source                        | Coal combustion |                    | Biomass burning |                    | Automobile exhaust |                    | Sulfate |                    | Nitrate |                    |
|-------------------------------|-----------------|--------------------|-----------------|--------------------|--------------------|--------------------|---------|--------------------|---------|--------------------|
|                               | Mean            | Standard deviation | Mean            | Standard deviation | Mean               | Standard deviation | Mean    | Standard deviation | Mean    | Standard deviation |
| OC                            | 0.1548          | 0.2046             | 0.2828          | 0.1075             | 0.2159             | 0.0945             | 0.0000  | 0.0000             | 0.0000  | 0.0000             |
| EC                            | 0.0386          | 0.0609             | 0.1280          | 0.1119             | 0.2420             | 0.1589             | 0.0000  | 0.0000             | 0.0000  | 0.0000             |
| V                             | 0.0002          | 0.0001             | 0.0001          | 0.0001             | 0.0007             | 0.0011             | 0.0000  | 0.0000             | 0.0000  | 0.0000             |
| Cr                            | 0.0001          | 0.0002             | 0.0012          | 0.0011             | 0.0004             | 0.0002             | 0.0000  | 0.0000             | 0.0000  | 0.0000             |
| Mn                            | 0.0001          | 0.0001             | 0.0001          | 0.0001             | 0.0004             | 0.0003             | 0.0000  | 0.0000             | 0.0000  | 0.0000             |
| Co                            | 0.0000          | 0.0000             | 0.0000          | 0.0000             | 0.0000             | 0.0000             | 0.0000  | 0.0000             | 0.0000  | 0.0000             |
| Ni                            | 0.0001          | 0.0000             | 0.0006          | 0.0005             | 0.0004             | 0.0002             | 0.0000  | 0.0000             | 0.0000  | 0.0000             |
| Cu                            | 0.0007          | 0.0006             | 0.0002          | 0.0002             | 0.0006             | 0.0002             | 0.0000  | 0.0000             | 0.0000  | 0.0000             |
| As                            | 0.0006          | 0.0008             | 0.0000          | 0.0001             | 0.0003             | 0.0005             | 0.0000  | 0.0000             | 0.0000  | 0.0000             |
| Pb                            | 0.0132          | 0.0083             | 0.0001          | 0.0001             | 0.0002             | 0.0001             | 0.0000  | 0.0000             | 0.0000  | 0.0000             |
| Na <sup>+</sup>               | 0.0166          | 0.0243             | 0.0071          | 0.0064             | 0.0312             | 0.0166             | 0.0000  | 0.0000             | 0.0000  | 0.0000             |
| NH <sub>4</sub> <sup>+</sup>  | 0.0860          | 0.0546             | 0.0073          | 0.0046             | 0.0074             | 0.0047             | 0.2730  | 0.0273             | 0.2250  | 0.0225             |
| K <sup>+</sup>                | 0.0055          | 0.0056             | 0.0929          | 0.0930             | 0.0039             | 0.0016             | 0.0000  | 0.0000             | 0.0000  | 0.0000             |
| Mg <sup>2+</sup>              | 0.0005          | 0.0003             | 0.0008          | 0.0006             | 0.0036             | 0.0015             | 0.0000  | 0.0000             | 0.0000  | 0.0000             |
| Ca <sup>2+</sup>              | 0.0043          | 0.0027             | 0.0055          | 0.0054             | 0.0322             | 0.0123             | 0.0000  | 0.0000             | 0.0000  | 0.0000             |
| F <sup>-</sup>                | 0.0018          | 0.0012             | 0.0031          | 0.0025             | 0.0108             | 0.0091             | 0.0000  | 0.0000             | 0.0000  | 0.0000             |
| Cl <sup>-</sup>               | 0.0273          | 0.0347             | 0.0928          | 0.0841             | 0.0148             | 0.0059             | 0.0000  | 0.0000             | 0.0000  | 0.0000             |
| SO <sub>4</sub> <sup>2-</sup> | 0.2504          | 0.1529             | 0.0185          | 0.0111             | 0.0191             | 0.0125             | 0.7270  | 0.0727             | 0.0000  | 0.0000             |
| NO <sub>3</sub> <sup>-</sup>  | 0.0125          | 0.0081             | 0.0119          | 0.0065             | 0.0421             | 0.0283             | 0.0000  | 0.0000             | 0.7750  | 0.0775             |

140
